# Supplementary material for: Driving factors and temporal fluctuation of Collembola communities and reproductive mode across forest types and regions
Source: PubMed Central journal article supplement (PMC5478087; doi:10.1002/ece3.3035), 2017-05-10
Supplement: ECE3-7-4390-s001.pdf [file ECE3-7-4390-s001.pdf]

**Table A1** Collembola species with abbreviations used in PCA (Fig. 2), and classification of taxonomic group, life form and reproductive mode (unkn. – unknown; parth. – parthenogenetic).

| Species                                                  | Abbreviation    | Taxonomic group   | Life form   | Reproductive Mode    |
|----------------------------------------------------------|-----------------|-------------------|-------------|----------------------|
| <i>Allacma fusca</i> (Linnaeus, 1758)                    | <i>All_fusc</i> | Sminthuridae      | atmobiote   | sexual               |
| <i>Arrhopalites pygmaeus</i> (Wankel, 1860)              | <i>Arr_pygm</i> | Arrhopalitidae    | hemiedaphic | sexual               |
| <i>Arrhopalites sp./juv.</i> Börner, 1906                |                 | Arrhopalitidae    | hemiedaphic | sexual               |
| <i>Ballistura cf. hankoi</i> (Stach, 1959)               |                 | Isotomidae        | epedaphic   | unkn./sexual         |
| <i>Brachystomella parvula</i> (Schaeffer, 1896)          |                 | Brachystomellidae | hemiedaphic | unkn./sexual         |
| <i>Ceratophysella armata</i> (Nicolet, 1842)             | <i>Cera_arm</i> | Hypogastruridae   | epedaphic   | sexual               |
| <i>Ceratophysella bengtssoni</i> (Ågren, 1904)           |                 | Hypogastruridae   | epedaphic   | sexual               |
| <i>Ceratophysella denticulata</i> (Bagnall, 1941)        | <i>Cera_den</i> | Hypogastruridae   | epedaphic   | sexual               |
| <i>Ceratophysella gibbosa</i> (Bagnall, 1940)            |                 | Hypogastruridae   | epedaphic   | sexual               |
| <i>Ceratophysella luteospina</i> (Stach, 1920)           |                 | Hypogastruridae   | epedaphic   | sexual               |
| <i>Ceratophysella sp./juv.</i> Börner, 1932              | <i>Cera_sp</i>  | Hypogastruridae   | epedaphic   | sexual               |
| <i>Ceratophysella succinea</i> (Gisin, 1949)             |                 | Hypogastruridae   | epedaphic   | sexual               |
| <i>Cryptopygus garretti</i> (Bagnall, 1939)              |                 | Isotomidae        | epedaphic   | sexual               |
| <i>Desoria violacea</i> (Tullberg, 1876)                 | <i>Deso_vio</i> | Isotomidae        | epedaphic   | sexual <sup>1)</sup> |
| <i>Deuteraphorura inermis</i> (Tullberg, 1871)           | <i>Deut_ine</i> | Onychiuridae      | euedaphic   | sexual <sup>1)</sup> |
| <i>Deuterosminthurus pallipes</i> (Bourlet, 1842)        |                 | Bourletiellidae   | epedaphic   | unkn./sexual         |
| <i>Deuterosminthurus sp.</i> Börner, 1901                |                 | Sminthuridae      | epedaphic   | unkn./sexual         |
| <i>Dicyrtoma fusca</i> (Lubbock, 1873)                   |                 | Sminthuridae      | atmobiote   | sexual               |
| <i>Dicyrtomina minuta</i> (Nicolet, 1842)                |                 | Dicyrtomidae      | atmobiote   | sexual               |
| <i>Dicyrtomina ornata</i> (Nicolet, 1842)                | <i>Dicy_orn</i> | Dicyrtomidae      | atmobiote   | sexual               |
| <i>Entomobrya cf. multifasciata</i> (Tullberg, 1871)     |                 | Entomobryidae     | atmobiote   | sexual               |
| <i>Entomobrya corticalis</i> (Nicolet, 1842)             |                 | Entomobryidae     | atmobiote   | sexual               |
| <i>Entomobrya marginata /lanuginosa</i> (Tullberg, 1871) | <i>Ent_marg</i> | Entomobryidae     | atmobiote   | sexual               |
| <i>Entomobrya quinquelineata</i> Börner, 1901            |                 | Entomobryidae     | atmobiote   | sexual               |
| <i>Entomobryidae juv.</i>                                | <i>Ent_juv</i>  | Entomobryidae     | atmobiote   | sexual               |
| <i>Folsomia brevicauda</i> Agrell, 1939                  |                 | Isotomidae        | hemiedaphic | sexual               |
| <i>Folsomia fimetaria</i> (Linnaeus, 1758)               |                 | Isotomidae        | hemiedaphic | sexual               |
| <i>Folsomia juv.</i>                                     |                 | Isotomidae        | hemiedaphic | sexual               |
| <i>Folsomia ksenemani</i> Stach, 1947                    |                 | Isotomidae        | hemiedaphic | sexual               |
| <i>Folsomia litsteri</i> (Bagnall, 1939)                 |                 | Isotomidae        | hemiedaphic | sexual               |
| <i>Folsomia quadrioculata</i> (Tullberg, 1871)           | <i>Fols_qua</i> | Isotomidae        | hemiedaphic | sexual               |
| <i>Folsomia spinosa</i> (Kseneman, 1936)                 | <i>Fols_spi</i> | Isotomidae        | hemiedaphic | parth. <sup>2)</sup> |

|                                                                 |                  |                 |             |                            |
|-----------------------------------------------------------------|------------------|-----------------|-------------|----------------------------|
| <b><i>Friesea claviseta</i></b> Axelson, 1900                   |                  | Neanuridae      | epedaphic   | sexual                     |
| <b><i>Friesea mirabilis</i></b> (Tullberg, 1871)                | <i>Fries_mi</i>  | Neanuridae      | epedaphic   | sexual                     |
| <b><i>Friesea truncata</i></b> Cassagnau, 1958                  |                  | Neanuridae      | epedaphic   | sexual                     |
| <b><i>Gisianus flammeolus</i></b> (Gisin, 1957)                 |                  | Katiannidae     | epedaphic   | unkn./sexual               |
| <b><i>Hymenaphorura juv.</i></b> Bagnall 1948                   |                  | Onychiuridae    | euedaphic   | unkn./sexual               |
| <b><i>Hypogastrura burkilli</i></b> (Bagnall, 1940)             |                  | Hypogastruridae | epedaphic   | sexual                     |
| <b><i>Hypogastrura purpurascens</i></b> (Lubbock, 1868)         | <i>Hyp_purp</i>  | Hypogastruridae | epedaphic   | unkn./sexual               |
| <b><i>Hypogastrura sahlbergi</i></b> (Reuter, 1895)             |                  | Hypogastruridae | epedaphic   | unkn./sexual               |
| <b><i>Isotoma hiemalis</i></b> Schött, 1893                     |                  | Isotomidae      | epedaphic   | sexual                     |
| <b><i>Isotoma juv. (cf. viridis)</i></b>                        |                  | Isotomidae      | epedaphic   | sexual                     |
| <b><i>Isotomidae</i></b>                                        | <i>Isotom</i>    | Isotomidae      | hemiedaphic | unkn./sexual               |
| <b><i>Isotomiella minor</i></b> (Schäffer, 1896)                | <i>Iso_mino</i>  | Isotomidae      | euedaphic   | parth. <sup>3)</sup>       |
| <b><i>Isotomurus palustris</i></b> (Muller, 1776)               |                  | Isotomidae      | epedaphic   | sexual                     |
| <b><i>Lepidocyrtus curvicolis</i></b> Bourlet, 1839             | <i>Lepi_cur</i>  | Entomobryidae   | epedaphic   | sexual                     |
| <b><i>Lepidocyrtus cyaneus</i></b> Tullberg, 1871               | <i>Lepi_cya</i>  | Entomobryidae   | epedaphic   | parth. <sup>3)</sup>       |
| <b><i>Lepidocyrtus juv.</i></b> Bourlet, 1839                   | <i>Lepi_juv</i>  | Entomobryidae   | epedaphic   | sexual                     |
| <b><i>Lepidocyrtus lanuginosus</i></b> (Gmelin, 1788)           | <i>Lepi_lanu</i> | Entomobryidae   | epedaphic   | sexual                     |
| <b><i>Lepidocyrtus lignorum</i></b> (Fabricius, 1793)           | <i>Lepi_lig</i>  | Entomobryidae   | epedaphic   | sexual                     |
| <b><i>Lepidocyrtus violaceus</i></b> (Geoffroy, 1762)           | <i>Lepi_vio</i>  | Entomobryidae   | epedaphic   | sexual                     |
| <b><i>Lipothrix (Sphyrotheca) lubbocki</i></b> (Tullberg, 1872) | <i>Lipo_lub</i>  | Sminthuridae    | epedaphic   | sexual                     |
| <b><i>Megalothorax minimus</i></b> Willem, 1900                 | <i>Mega_min</i>  | Neelidae        | euedaphic   | parth. <sup>4)</sup>       |
| <b><i>Mesaphorura italica</i></b> (Rusek, 1971)                 |                  | Tullbergiidae   | euedaphic   | parth. <sup>5)</sup>       |
| <b><i>Mesaphorura jarmilae</i></b> Rusek, 1982                  |                  | Tullbergiidae   | euedaphic   | unkn./parth.               |
| <b><i>Mesaphorura macrochaeta</i></b> Rusek, 1976               | <i>Mesa_mac</i>  | Tullbergiidae   | euedaphic   | parth. <sup>6)</sup>       |
| <b><i>Mesaphorura sp.</i></b> Börner, 1901                      | <i>Mesa_sp</i>   | Tullbergiidae   | euedaphic   | unkn./parth.               |
| <b><i>Mesaphorura sylvatica</i></b> (Rusek, 1971)               | <i>Mesa_syl</i>  | Tullbergiidae   | euedaphic   | parth. <sup>7)</sup>       |
| <b><i>Mesaphorura tenuisensillata</i></b> Rusek, 1974           |                  | Tullbergiidae   | euedaphic   | parth. <sup>8)</sup>       |
| <b><i>Mesaphorura yosii</i></b> (Rusek, 1967)                   | <i>Mesa_yos</i>  | Tullbergiidae   | euedaphic   | unkn./parth.               |
| <b><i>Metaphorura affinis</i></b> (Börner, 1903)                |                  | Tullbergiidae   | euedaphic   | parth. <sup>6)</sup>       |
| <b><i>Micanurida forsslundi</i></b> Gisin, 1949                 |                  | Neanuridae      | euedaphic   | unkn./sexual               |
| <b><i>Micranurida cf. sensillata</i></b> (Gisin, 1953)          |                  | Neanuridae      | euedaphic   | unkn./sexual               |
| <b><i>Micranurida granulata</i></b> (Agrell, 1943)              | <i>Micra_gr</i>  | Neanuridae      | euedaphic   | unkn./sexual               |
| <b><i>Micranurida juv.</i></b> Börner, 1901                     |                  | Neanuridae      | euedaphic   | unkn./sexual               |
| <b><i>Micranurida pygmaea</i></b> Börner, 1901                  | <i>Micra_py</i>  | Neanuridae      | euedaphic   | parth. <sup>9)</sup>       |
| <b><i>Micraphorura absoloni</i></b> (Börner, 1901)              | <i>Micra_ab</i>  | Onychiuridae    | euedaphic   | parth. <sup>10), 11)</sup> |
| <b><i>Neanura muscorum</i></b> (Templeton, 1835)                | <i>Nean_mus</i>  | Neanuridae      | hemiedaphic | parth. <sup>3)</sup>       |
| <b><i>Neelides minutus</i></b> (Folsom, 1901)                   |                  | Neelidae        | euedaphic   | parth. <sup>12)</sup>      |
| <b><i>Neonaphorura duboscqi</i></b> (Denis, 1932)               |                  | Tullbergiidae   | euedaphic   | unkn./sexual               |

|                                                                |                  |                |             |                           |
|----------------------------------------------------------------|------------------|----------------|-------------|---------------------------|
| <b><i>Neotullbergia ramicuspis</i></b> (Gisin, 1953)           |                  | Onychiuridae   | euedaphic   | sexual                    |
| <b><i>Oncopodura crassicornis</i></b><br>Shoebbotham, 1911     |                  | Oncopoduridae  | euedaphic   | unkn./sexual              |
| <b><i>Orchesella bifasciata</i></b> (Bourlet, 1839)            |                  | Entomobryidae  | atmobiotic  | sexual                    |
| <b><i>Orchesella cf. flavescens</i></b> (Bourlet, 1839)        |                  | Entomobryidae  | atmobiotic  | parth. <sup>3)</sup>      |
| <b><i>Paratullbergia callipygos</i></b> (Börner, 1902)         | <i>Para_cal</i>  | Tullbergiidae  | euedaphic   | parth. <sup>6), 11)</sup> |
| <b><i>Paratullbergia macdougalli</i></b> Bagnall, 1936         |                  | Tullbergiidae  | euedaphic   | unkn./parth.              |
| <b><i>Paratullbergia sp.</i></b> Womersley, 1930               | <i>Parat_sp</i>  | Tullbergiidae  | euedaphic   | unkn./parth.              |
| <b><i>Parisotoma notabilis</i></b> (Schaeffer, 1896)           | <i>Pari_not</i>  | Isotomidae     | hemiedaphic | parth <sup>3)</sup>       |
| <b><i>Proisotoma minima</i></b> (Absolon, 1901)                |                  | Isotomidae     | epedaphic   | parth <sup>9)</sup>       |
| <b><i>Proisotoma minuta</i></b> (Tullberg, 1871)               | <i>Prois_mi</i>  | Isotomidae     | epedaphic   | sexual <sup>1)</sup>      |
| <b><i>Protaphorura armata</i></b> (Tullberg, 1869)             | <i>Prota_ar</i>  | Onychiuridae   | euedaphic   | parth <sup>5)</sup>       |
| <b><i>Protaphorura aurantiaca</i></b> (Ridley, 1880)           |                  | Onychiuridae   | euedaphic   | sexual                    |
| <b><i>Protaphorura fimata</i></b> (Gisin, 1952)                | <i>Prota_fi</i>  | Onychiuridae   | euedaphic   | sexual                    |
| <b><i>Protaphorura quadricellata</i></b> (Gisin, 1947)         | <i>Prota_qu</i>  | Onychiuridae   | euedaphic   | sexual                    |
| <b><i>Protaphorura sp.</i></b> Absolon, 1901                   | <i>Prota_sp</i>  | Onychiuridae   | euedaphic   | sexual                    |
| <b><i>Pseudachorutes cf. dubius</i></b><br>Krausbauer, 1898    |                  | Neanuridae     | epedaphic   | sexual                    |
| <b><i>Pseudachorutes subcrassus</i></b> Tullberg, 1871         |                  | Neanuridae     | epedaphic   | sexual                    |
| <b><i>Pseudanurophorus binoculatus</i></b><br>Kseneman, 1934   |                  | Isotomidae     | hemiedaphic | parth. <sup>1)</sup>      |
| <b><i>Pseudosinella alba</i></b> (Packard, 1873)               | <i>Pseud_al</i>  | Entomobryidae  | euedaphic   | sexual                    |
| <b><i>Pseudosinella decipiens</i></b> Denis, 1924              |                  | Entomobryidae  | euedaphic   | unkn./sexual              |
| <b><i>Pseudosinella immaculata</i></b> (Lie-Pettersen, 1896)   |                  | Entomobryidae  | euedaphic   | unkn./sexual              |
| <b><i>Pseudosinella ksenemani /denisi</i></b><br>(Gisin, 1954) |                  | Entomobryidae  | euedaphic   | unkn./sexual              |
| <b><i>Sminthuridae juv.</i></b>                                |                  | Sminthurididae | epedaphic   | unkn./sexual              |
| <b><i>Sminthurides sp.</i></b> Börner, 1900                    |                  | Sminthurididae | epedaphic   | unkn./sexual              |
| <b><i>Sminthurinus aureus</i></b> (Lubbock, 1862)              | <i>Sminth_a</i>  | Katiannidae    | epedaphic   | sexual/both               |
| <b><i>Sminthurinus niger</i></b> (Lubbock, 1868)               | <i>Sminth_n</i>  | Katiannidae    | epedaphic   | sexual <sup>3)</sup>      |
| <b><i>Sminthurinus sp. juv.</i></b> Börner, 1901               | <i>Sminthur</i>  | Katiannidae    | epedaphic   | unkn./sexual              |
| <b><i>Sminthurus viridis</i></b> (Linnaeus, 1758)              | <i>Sminth_v</i>  | Sminthuridae   | epedaphic   | unkn./sexual              |
| <b><i>Sphaeridia pumilis</i></b> (da Gama, 1964)               | <i>Sphae_pu</i>  | Sminthurididae | epedaphic   | sexual <sup>3)</sup>      |
| <b><i>Stenaphorura denisi</i></b> (Bagnall, 1935)              | <i>Stena_de</i>  | Tullbergiidae  | euedaphic   | parth <sup>7), 11)</sup>  |
| <b><i>Stenaphorura quadripina</i></b> (Börner, 1901)           |                  | Tullbergiidae  | euedaphic   | sexual                    |
| <b><i>Supraphorura furcifera</i></b> (Börner, 1901)            | <i>Supra_fu</i>  | Onychiuridae   | euedaphic   | unkn./sexual              |
| <b><i>Tomocerus baudoti</i></b> Denis, 1932                    |                  | Tomoceridae    | epedaphic   | sexual                    |
| <b><i>Tomocerus flavescens</i></b> (Tullberg, 1871)            | <i>Tomo_fla</i>  | Tomoceridae    | epedaphic   | sexual                    |
| <b><i>Tomocerus minor</i></b> (Lubbock, 1862)                  | <i>Tomo_mino</i> | Tomoceridae    | epedaphic   | sexual                    |

|                                            |                  |                 |           |                       |
|--------------------------------------------|------------------|-----------------|-----------|-----------------------|
| <i>Tomocerus minutus</i> (Tullberg, 1876)  | <i>Tomo_minu</i> | Tomoceridae     | epedaphic | sexual                |
| <i>Tomocerus vulgaris</i> (Tullberg, 1871) | <i>Tomo_vul</i>  | Tomoceridae     | epedaphic | sexual                |
| <i>Tullbergia simplex</i>                  | <i>Tulb_si</i>   | Tullbergiidae   | euedaphic | parth <sup>6)</sup>   |
| <i>Willemia anophthalma</i> Börner, 1901   |                  | Hypogastruridae | euedaphic | parth <sup>9)</sup>   |
| <i>Willemia aspinata</i> Stach, 1949       |                  | Hypogastruridae | euedaphic | parth <sup>3)</sup>   |
| <i>Xenylla sp.</i> Tullberg, 1869          |                  | Hypogastruridae | epedaphic | unkn./sexual          |
| <i>Xenylla grisea</i> Axelson, 1900        |                  | Hypogastruridae | epedaphic | sexual <sup>13)</sup> |

### References for reproductive mode:

- 1) Santorufu, L. et al. 2014. An assessment of the influence of the urban environment on collembolan communities in soils using taxonomy- and trait-based approaches. - *Appl. Soil Ecol.* 78: 48–56.
- 2) Fjellberg, A. 2007. The Collembola of Fennoscandia and Denmark. Part II: Entomobryomorpha and Symphy-pleona. - *Fauna Entomol. Scand.* 42: 1–263.
- 3) Chahartaghi, M. et al. 2006. Sex ratio and mode of reproduction in Collembola of an oak-beech forest. - *Pedobiologia* 50: 331–340.
- 4) Petersen, H. 1971. Parthenogenesis in two common species of Collembola: *Tullbergia krausbaueri* (Börner) and *Isotoma notabilis* Schäffer. - *Rev. Ecol. Biol. Sol*, 8: 133–138.
- 5) Czarnetzki, A. B. and Tebbe, C. C. 2004. Diversity of bacteria associated with Collembola - A cultivation- independent survey based on PCR-amplified 16S rRNA genes. - *FEMS Microbiol. Ecol.* 49: 217–227.
- 6) Fjellberg, A. 1998. The Collembola of Fennoscandia and Denmark. Part I: Poduromorpha. - *Fauna Entomol. Scand.* 35: 1–183 (1998).
- 7) Petersen, H. 1980. Population dynamic and metabolic characterization of Collembola species in a beech forest ecosystem. In: Dindal, D. L. (ed) *Soil biology as related to land use practices. Proceedings of the VII International Soil Zoology Colloquium of the I.S.S.S., Syracuse, N.Y., U.S.A. July 29 Aug. 3, 1979.* EPA560/1380038, Washington D.C., pp. 806–833.
- 8) Russell, D.J., Hohberg, K. and Pfanz, H. 2011. Occurrence of collembolan fauna in mofette fields (natural carbon- dioxide springs) of the Czech Republic. - *Soil Org.* 83: 489–505.
- 9) Chernova, N. M. et al. 2010. Ecological significance of parthenogenesis in collembola. - *Entomol. Rev.* 90: 23–38.
- 10) Pomorski, R.J. 1998. Onychiurinae of Poland (Collembola: Onychiuridae). - *Genus Suppl.* 9: 1–201.
- 11) Petersen, H. 1978. Sex-ratios and the extent of parthenogenetic reproduction in some collembolan populations. *First International Seminar on Apterygota. Accademia delle Scienze di Siena detta de'Fisiocritici, Siena.*
- 12) Schneider, C. et al. 2011. Unexpected diversity in Neelipleona revealed by molecular phylogeny approach (Hexapoda, Collembola). - *Soil Org.* 83: 383–398.
- 13) Sharma, G. D. and Metz, L. J. 1976. Biology of the Collembola *Xenylla grisea* Axelson and *Lepidocyrtus cyaneus* f. *cinereus* Folsom. - *Ecol. Entomol.* 1: 209-212.

### References for classification of life form

- Christiansen, K. 1964. Bionomics of Collembola. - *Annu. Rev. Entomol.* 9: 147-178.
- Rusek, J., 2007. A new classification of Collembola and Protura life forms. - In: Tajovský, K. et al. (eds.), *Contributions to soil zoology in Central Europe II.* pp. 109-115.

**Table A2** Repeated measures GLM for differences in the abundance of parthenogenetic and sexual Collembola as influenced by region (Explo), forest type (Forest) and year (Date). Parthenogenetic – species that were observed to have parthenogenetic populations; Sexual – species with sexual reproduction; Complete parth. and Complete sex. - including “unknown/parthenogenetic” and “unknown/sexual” species, respectively, from Table A1. Significant effects are marked in bold.

|                                | DF | Parthenogenetic |              | Sexual      |              | Complete parth. |               | Complete sex. |              |
|--------------------------------|----|-----------------|--------------|-------------|--------------|-----------------|---------------|---------------|--------------|
|                                |    | F               | p            | F           | p            | F               | p             | F             | p            |
| <b>Between subject effects</b> |    |                 |              |             |              |                 |               |               |              |
| Explo                          | 2  | 1.08            | 0.351        | 1.82        | 0.177        | 0.44            | 0.645         | 1.98          | 0.153        |
| Forest                         | 3  | <b>4.05</b>     | <b>0.014</b> | 0.56        | 0.647        | <b>5.65</b>     | <b>0.003</b>  | 0.51          | 0.681        |
| Explo*Forest                   | 6  | 1.18            | 0.341        | 1.58        | 0.181        | 0.87            | 0.527         | 1.51          | 0.204        |
| Error                          | 36 |                 |              |             |              |                 |               |               |              |
| <b>Within subject effects</b>  |    |                 |              |             |              |                 |               |               |              |
| Date                           | 1  | <b>9.59</b>     | <b>0.004</b> | 1.18        | 0.285        | <b>18.14</b>    | <b>0.0001</b> | 1.60          | 0.214        |
| Date*Explo                     | 2  | <b>7.65</b>     | <b>0.002</b> | <b>5.55</b> | <b>0.008</b> | <b>11.08</b>    | <b>0.0002</b> | <b>5.03</b>   | <b>0.012</b> |
| Date*Forest                    | 3  | 1.02            | 0.397        | 1.30        | 0.290        | 2.33            | 0.091         | 1.30          | 0.289        |
| Date*Explo*Forest              | 6  | 0.58            | 0.741        | 0.56        | 0.758        | 0.92            | 0.492         | 0.53          | 0.783        |
| Error                          | 36 |                 |              |             |              |                 |               |               |              |

**Table A3** Regression weights for paths in structural equation models for Collembola abundance at a) T1 and b) T2 and c) and d) for abundance of only parthenogenetic and sexual Collembola at T1, respectively. Estimate – estimate of regression weight, S.E. – standard error for estimate, C.R. – critical ratio for regression weight, P – level of significance for regression weight, \*\*\* - P< 0.001. For the respective structural equation models see Fig. 4 a), b), c) and d).

| <b>a) T1</b>                |                               | Estimate   | S.E.      | C.R.   | P    |
|-----------------------------|-------------------------------|------------|-----------|--------|------|
| pH soil                     | ← ForMI                       | .005       | .181      | .027   | .979 |
| fung/bact litter            | ← ForMI                       | -.718      | .293      | -2.447 | .014 |
| fung/bact litter            | ← pH_soil                     | .924       | .244      | 3.791  | ***  |
| CN ratio litter             | ← fung/bact litter            | .784       | .573      | 1.368  | .171 |
| litter (g/cm <sup>2</sup> ) | ← ForMI                       | .141       | .060      | 2.338  | .019 |
| litter (g/cm <sup>2</sup> ) | ← pH soil                     | .025       | .054      | .464   | .642 |
| litter (g/cm <sup>2</sup> ) | ← fung/bact litter            | -.091      | .029      | -3.139 | .002 |
| CN ratio litter             | ← pH soil                     | -.844      | 1.121     | -.753  | .452 |
| C <sub>mic</sub> soil       | ← pH soil                     | 513.449    | 46.805    | 10.970 | ***  |
| C <sub>mic</sub> soil       | ← ForMI                       | 6.270      | 56.334    | .111   | .911 |
| summe_ind                   | ← fung/bact litter            | 2125.608   | 2813.986  | .755   | .450 |
| summe_ind                   | ← litter (g/cm <sup>2</sup> ) | 47931.214  | 12488.027 | 3.838  | ***  |
| summe_ind                   | ← C <sub>mic</sub> soil       | -.378      | 13.162    | -.029  | .977 |
| summe_ind                   | ← pH soil                     | -18051.671 | 8242.627  | -2.190 | .029 |
| summe_ind                   | ← CN ratio litter             | -446.179   | 622.902   | -.716  | .474 |

| <b>b) T2</b>                |                               | Estimate  | S.E.      | C.R.   | P    |
|-----------------------------|-------------------------------|-----------|-----------|--------|------|
| pH soil                     | ← ForMI                       | -.144     | .193      | -.747  | .455 |
| fung/bact litter            | ← ForMI                       | -.355     | .200      | -1.771 | .077 |
| fung/bact litter            | ← pH soil                     | .351      | .150      | 2.344  | .019 |
| CN ratio litter             | ← fung/bact litter            | .813      | .826      | .984   | .325 |
| litter (g/cm <sup>2</sup> ) | ← ForMI                       | .006      | .017      | .376   | .707 |
| litter (g/cm <sup>2</sup> ) | ← pH_soil                     | -.065     | .013      | -5.006 | ***  |
| CN ratio litter             | ← pH soil                     | -.839     | 1.145     | -.732  | .464 |
| C <sub>mic</sub> soil       | ← pH soil                     | 445.878   | 78.076    | 5.711  | ***  |
| C <sub>mic</sub> soil       | ← ForMI                       | 67.753    | 104.260   | .650   | .516 |
| litter (g/cm <sup>2</sup> ) | ← fung/bact litter            | .003      | .012      | .262   | .793 |
| summe_ind                   | ← litter (g/cm <sup>2</sup> ) | 52085.806 | 53425.213 | .975   | .330 |
| summe_ind                   | ← C <sub>mic</sub> soil       | 18.077    | 8.591     | 2.104  | .035 |
| summe_ind                   | ← pH soil                     | 3581.515  | 7084.716  | .506   | .613 |
| summe_ind                   | ← fung/bact litter            | -2111.746 | 4321.431  | -.489  | .625 |
| summe_ind                   | ← CN ratio litter             | -1501.520 | 753.980   | -1.991 | .046 |

| <b>c) T1 parth.</b>         |                    | Estimate | S.E.   | C.R.   | P    |
|-----------------------------|--------------------|----------|--------|--------|------|
| pH soil                     | ← ForMI            | .019     | .175   | .106   | .916 |
| fung/bact litter            | ← ForMI            | -.717    | .289   | -2.481 | .013 |
| fung/bact litter            | ← pH soil          | .914     | .240   | 3.807  | ***  |
| C <sub>mic</sub> soil       | ← pH soil          | 526.086  | 49.066 | 10.722 | ***  |
| C <sub>mic</sub> soil       | ← ForMI            | -38.905  | 59.084 | -.658  | .510 |
| CN ratio litter             | ← fung/bact litter | .783     | .571   | 1.372  | .170 |
| litter (g/cm <sup>2</sup> ) | ← ForMI            | .139     | .058   | 2.410  | .016 |
| litter (g/cm <sup>2</sup> ) | ← pH_soil          | .029     | .052   | .565   | .572 |
| litter (g/cm <sup>2</sup> ) | ← fung/bact litter | -.087    | .028   | -3.053 | .002 |

|                 |   |                             |            |          |        |      |
|-----------------|---|-----------------------------|------------|----------|--------|------|
| CN ratio litter | ← | pH soil                     | -1.660     | 1.828    | -.908  | .364 |
| CN ratio litter | ← | C <sub>mic</sub> soil       | .002       | .003     | .602   | .547 |
| Parth Coll.     | ← | fung/bact litter            | 379.930    | 2211.579 | .172   | .864 |
| Parth Coll.     | ← | litter (g/cm <sup>2</sup> ) | 36104.836  | 9730.269 | 3.711  | ***  |
| Parth Coll.     | ← | C <sub>mic</sub> soil       | -5.622     | 9.249    | -.608  | .543 |
| Parth Coll.     | ← | pH soil                     | -11153.273 | 6038.875 | -1.847 | .065 |
| Parth Coll.     | ← | CN ratio litter             | 165.826    | 475.213  | .349   | .727 |

| d) T1 sex.                  |   |                             | Estimate  | S.E.     | C.R.   | P    |
|-----------------------------|---|-----------------------------|-----------|----------|--------|------|
| pH soil                     | ← | ForMI                       | .012      | .177     | .066   | .947 |
| fung/bact litter            | ← | ForMI                       | -.707     | .295     | -2.399 | .016 |
| fung/bact litter            | ← | pH soil                     | .885      | .243     | 3.641  | ***  |
| CN ratio litter             | ← | fung/bact litter            | .613      | .566     | 1.083  | .279 |
| litter (g/cm <sup>2</sup> ) | ← | ForMI                       | .138      | .057     | 2.413  | .016 |
| litter (g/cm <sup>2</sup> ) | ← | pH soil                     | .022      | .051     | .430   | .667 |
| litter (g/cm <sup>2</sup> ) | ← | fung/bact litter            | -.089     | .028     | -3.226 | .001 |
| CN ratio litter             | ← | pH soil                     | -.593     | 1.082    | -.548  | .584 |
| C <sub>mic</sub> soil       | ← | pH soil                     | 526.692   | 48.708   | 10.813 | ***  |
| C <sub>mic</sub> soil       | ← | ForMI                       | -39.182   | 59.046   | -.664  | .507 |
| Sexual Coll.                | ← | fung/bact litter            | 2946.534  | 1419.855 | 2.075  | .038 |
| Sexual Coll.                | ← | litter (g/cm <sup>2</sup> ) | 10190.887 | 6463.087 | 1.577  | .115 |
| Sexual Coll.                | ← | C <sub>mic</sub> soil       | 4.096     | 6.046    | .678   | .498 |
| Sexual Coll.                | ← | pH soil                     | -7170.213 | 3911.652 | -1.833 | .067 |
| Sexual Coll.                | ← | CN ratio litter             | -1004.070 | 308.113  | -3.259 | .001 |
