# Supplementary material for: Driving factors and temporal fluctuation of Collembola communities and reproductive mode across forest types and regions
Source: PubMed Central journal article supplement (PMC5478087; doi:10.1002/ece3.3035), 2017-05-10
Supplement: ECE3-7-4390-s002.pdf [file ECE3-7-4390-s002.pdf]

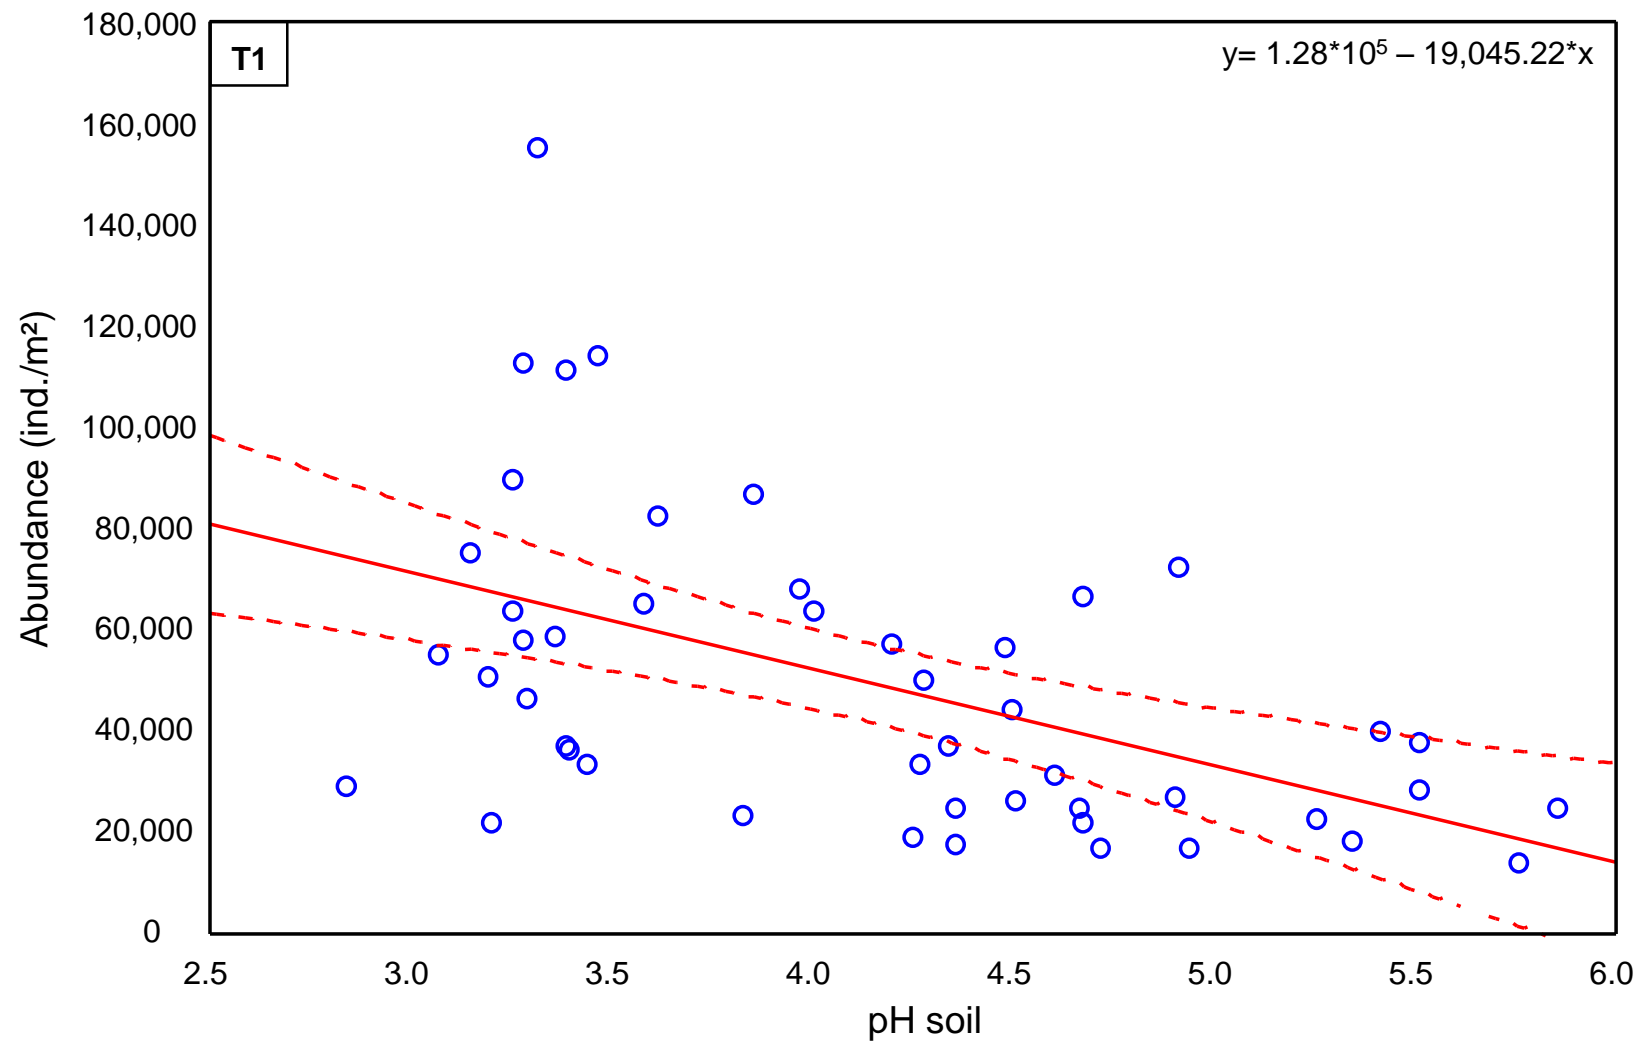

Fig. A1

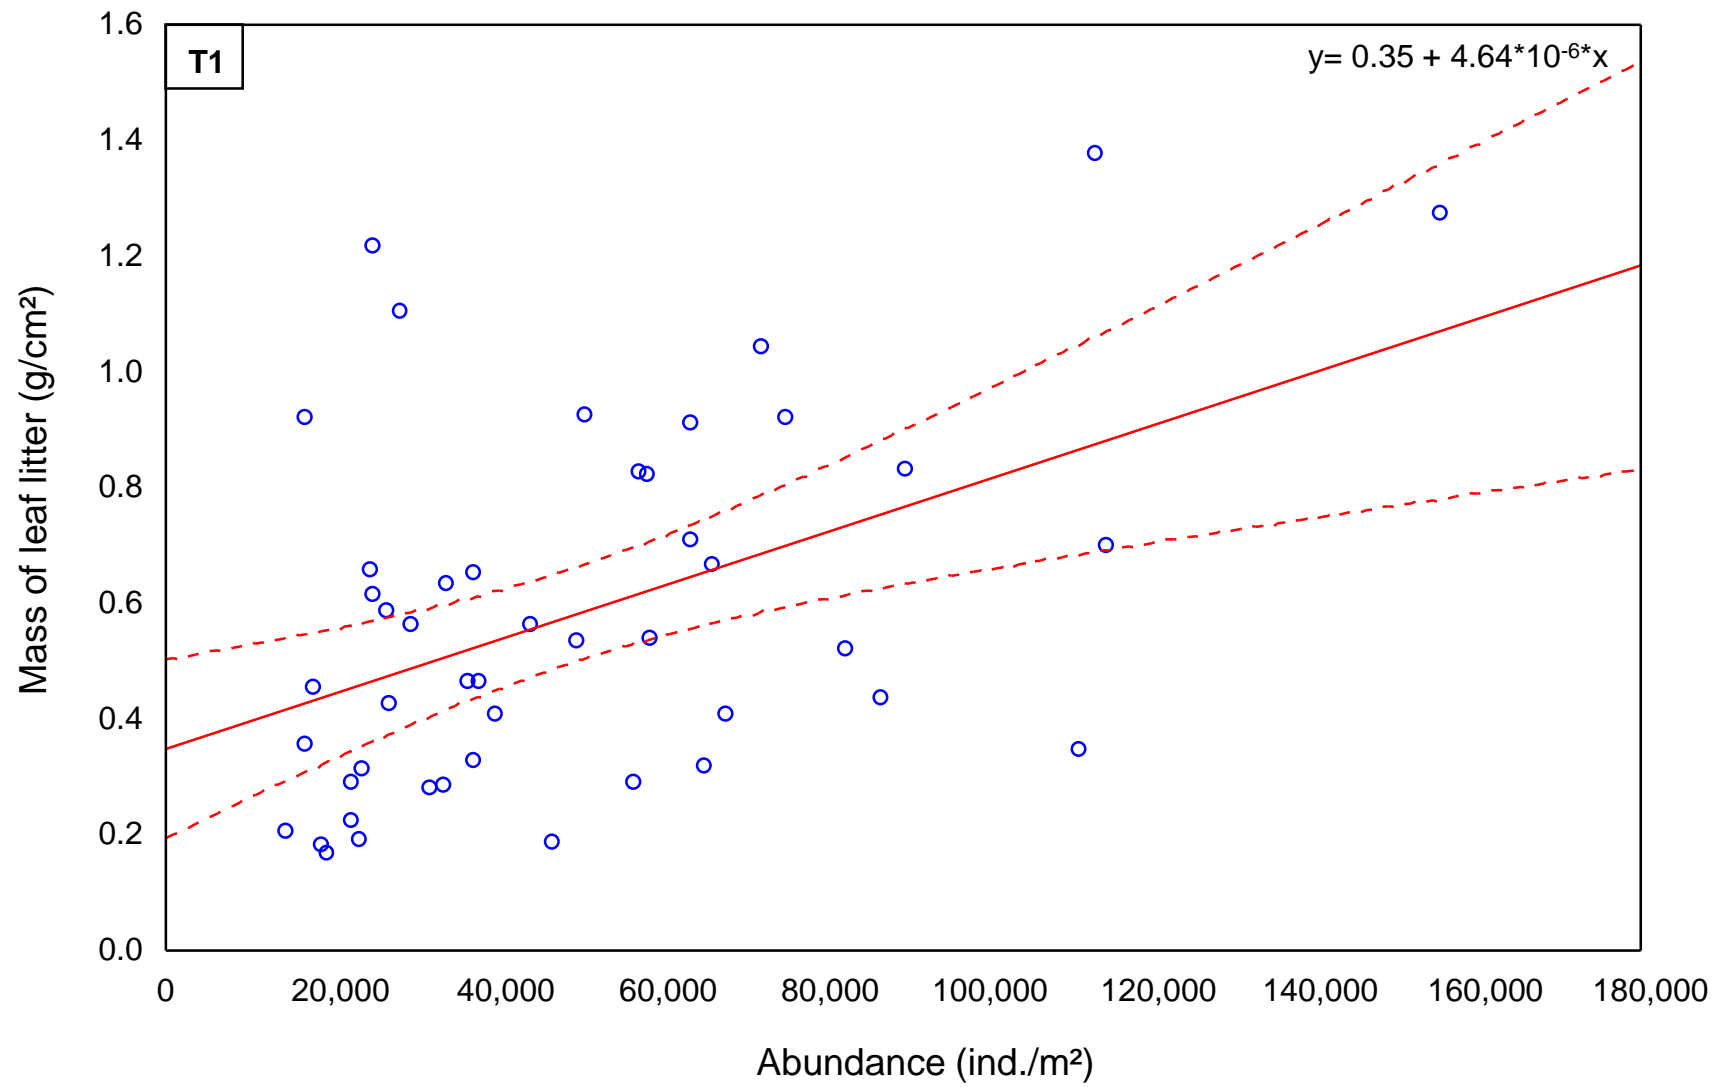

Fig. A2

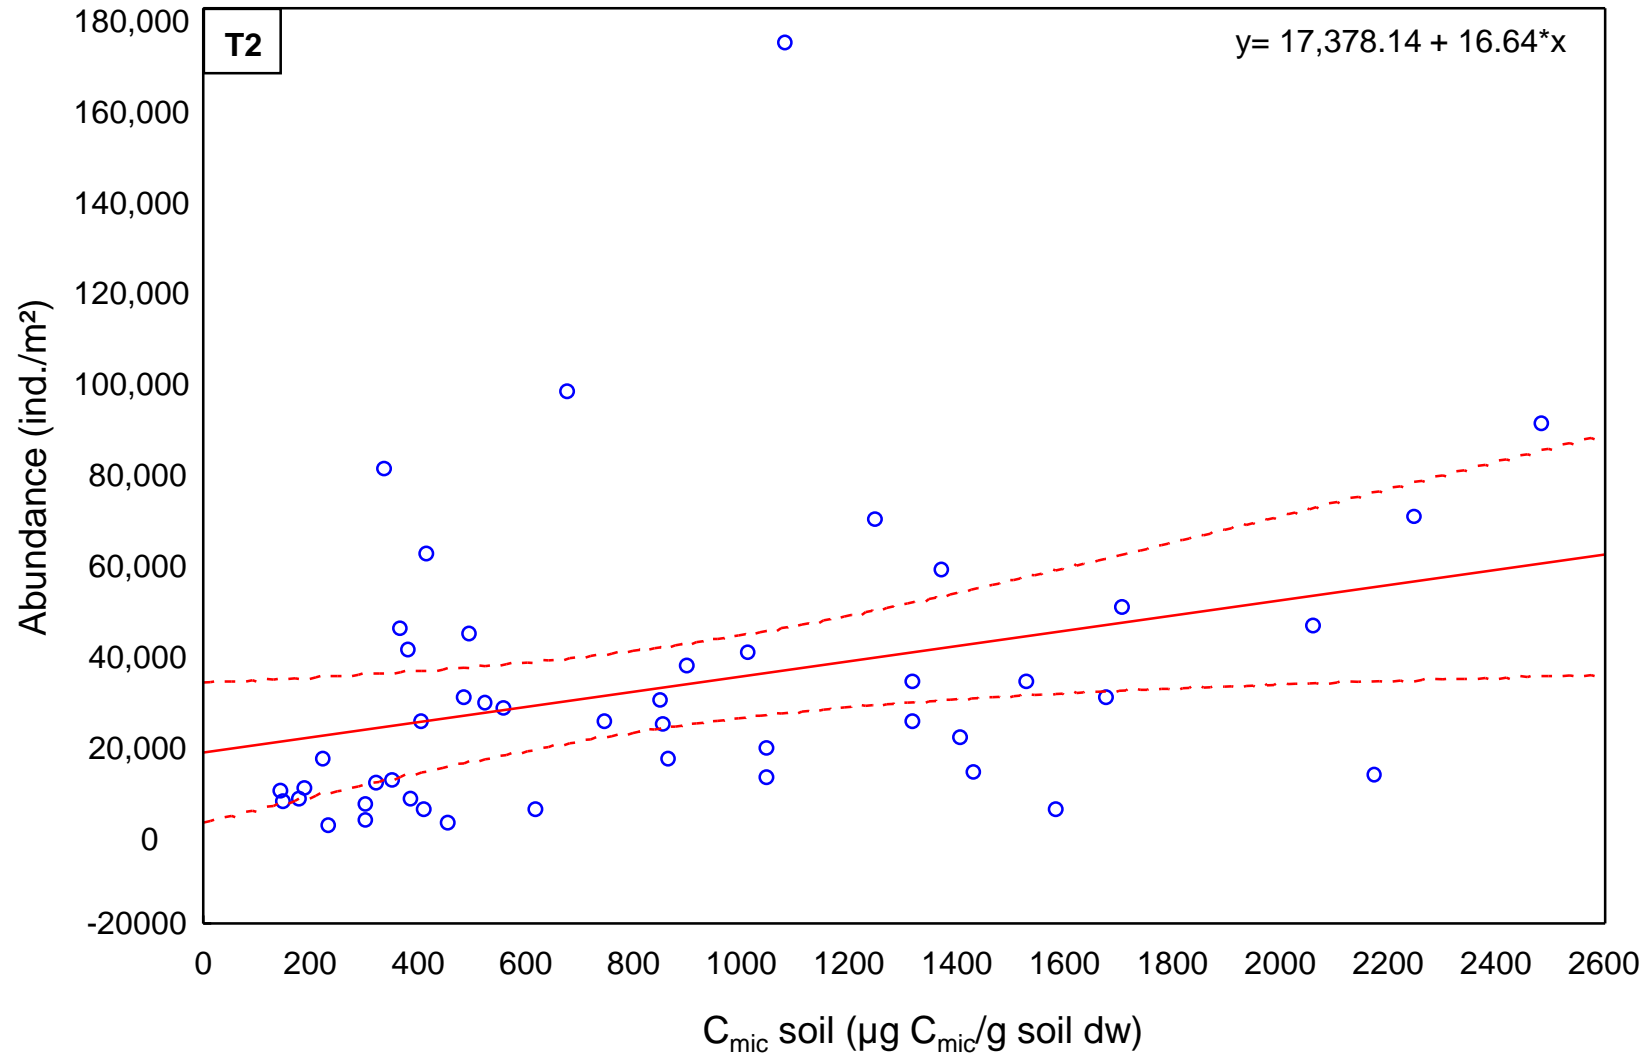

Fig. A3

1 **Legends to figures in Supplementary material Appendix 2**

2

3 **Fig. A1** Correlation between pH of soil and the abundance of Collembola (individuals per m<sup>2</sup>)  
4 in 2008 (T1). Regression bands represent 95 % confidence intervals.

5

6 **Fig. A2** Correlation between abundance of Collembola (individuals per m<sup>2</sup>) and mass of leaf  
7 litter (g/cm<sup>2</sup>) in 2008 (T1). Regression bands represent 95 % confidence intervals.

8

9 **Fig. A3** Correlation between microbial biomass of soil (C<sub>mic</sub> soil) and abundance of  
10 Collembola (individuals per m<sup>2</sup>) in 2011 (T2). dw: dry weight. Regression bands represent  
11 95 % confidence intervals.
